# Supplementary material
Source: publisher figshare collection journal article supplement (https://acs.figshare.com/ndownloader/files/4306915)
Supplement: Supplementary file 1 [file 4306915]

# Supporting information for: Structure Directing Role of Counter Ions in the Initial Stage of Zeolite Synthesis

Xue-Qing Zhang,<sup>†</sup> Thuat T. Trinh,<sup>†,‡</sup> Rutger A. van Santen,<sup>†</sup> and Antonius P. J.  
Jansen<sup>\*,†</sup>

*Laboratory of Inorganic Chemistry and Catalysis, ST/SKA*

*Eindhoven University of Technology*

*P. O. Box 513, 5600 MB Eindhoven, The Netherlands , and Laboratoire de Chimie*

*Ecole Normale Supérieure de Lyon*

*46, Allée d'Italie 69364 LYON Cedex 07, France*

E-mail: a.p.j.jansen@tue.nl

---

\*To whom correspondence should be addressed

<sup>†</sup>Laboratory of Inorganic Chemistry and Catalysis, ST/SKA  
Eindhoven University of Technology  
P. O. Box 513, 5600 MB Eindhoven, The Netherlands

<sup>‡</sup>Laboratoire de Chimie  
Ecole Normale Supérieure de Lyon  
46, Allée d'Italie 69364 LYON Cedex 07, France

# Modeling Oligomerization

In the case of dimerization, there are two mechanisms. The first of these is the so-called neutral mechanism, in which the two reactants are neutral. The second mechanism, the so-called anionic mechanism, proposes that the reactants consist of two monomers, one being deprotonated. The anionic mechanism has been shown to be more favorable. Therefore we used the preferred anionic mechanism in this work.<sup>1</sup>

The formation of silicate oligomers can be described by the following equations. The following symbols are used;  $\cdots$  for the reactant complex,  $\text{--O--}$  for the intermediate species,  $\cdots\text{H}_2\text{O}$  for the leaving water,  $\triangle$  for the 3-ring and  $\perp$  for the branched tetramer.

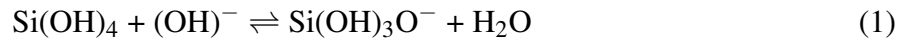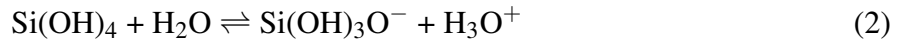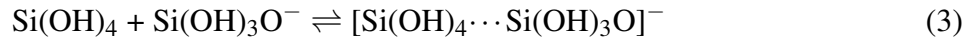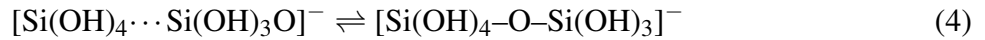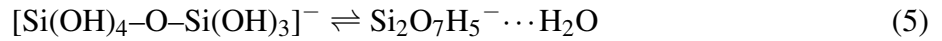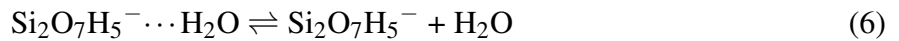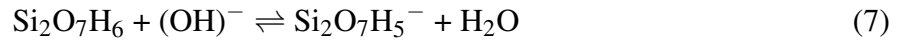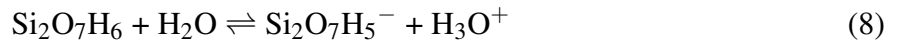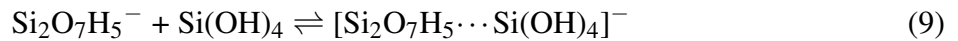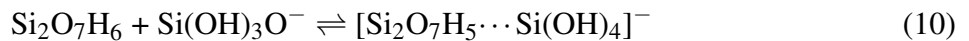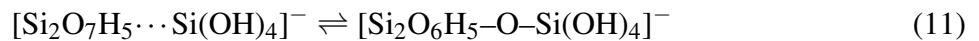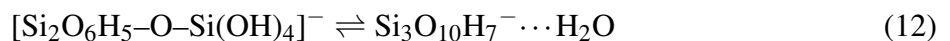

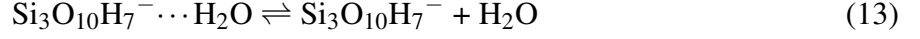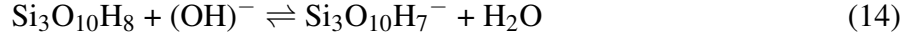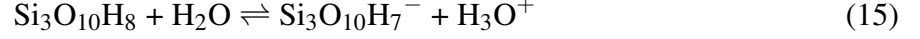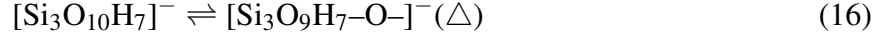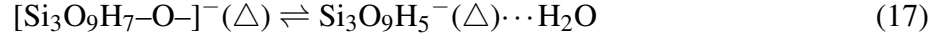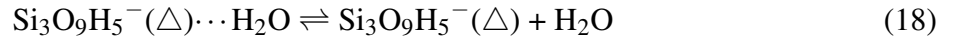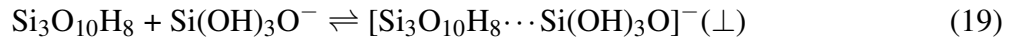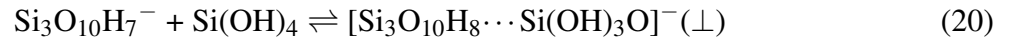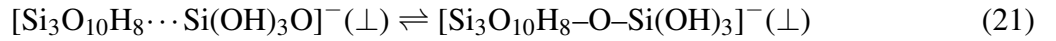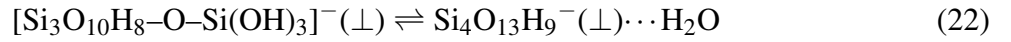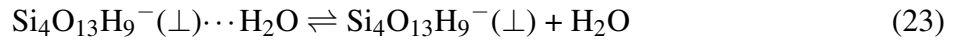

The corresponding activation energies and prefactors of oligomerization and reverse reactions in the absence of counter ion are listed in Table 1.

**Table 1: Calculated activation energies [kJ mol<sup>-1</sup>], in the absence of counter ion, and prefactors of reactions from Eq. (1) to Eq. (23). The unit of the prefactors is s<sup>-1</sup>. The first column is the reactions numbered corresponding to the Equations Eq. (1) to Eq. (23) listed above.  $E_{act}(1)$  and Pref(1) are the activation energy and prefactor of forward reaction respectively.  $E_{act}(-1)$  and Pref(-1) are the activation energy and prefactor of reverse reaction respectively. The temperature is 350 K and pH = 7.**

| Reactions | $E_{act}(1)$ | Pref(1)                | $E_{act}(-1)$ | Pref(-1)               |
|-----------|--------------|------------------------|---------------|------------------------|
| 1         | 0            | $1.484 \times 10^4$    | 99            | $8.050 \times 10^{12}$ |
| 2         | 191          | $8.040 \times 10^{12}$ | 0             | $1.417 \times 10^4$    |
| 3         | 0            | $1.820 \times 10^7$    | 28            | $7.293 \times 10^{12}$ |
| 4         | 44           | $7.293 \times 10^{12}$ | 25            | $7.293 \times 10^{12}$ |

|    |     |                        |    |                        |
|----|-----|------------------------|----|------------------------|
| 5  | 42  | $7.293 \times 10^{12}$ | 86 | $7.293 \times 10^{12}$ |
| 6  | 9   | $7.293 \times 10^{12}$ | 0  | $7.750 \times 10^{12}$ |
| 7  | 0   | $1.434 \times 10^4$    | 99 | $7.750 \times 10^{12}$ |
| 8  | 191 | $7.750 \times 10^{12}$ | 0  | $1.360 \times 10^4$    |
| 9  | 0   | $1.600 \times 10^7$    | 31 | $7.293 \times 10^{12}$ |
| 10 | 0   | $1.600 \times 10^7$    | 54 | $7.293 \times 10^{12}$ |
| 11 | 43  | $7.293 \times 10^{12}$ | 23 | $7.293 \times 10^{12}$ |
| 12 | 33  | $7.293 \times 10^{12}$ | 78 | $7.293 \times 10^{12}$ |
| 13 | 7   | $7.293 \times 10^{12}$ | 0  | $7.640 \times 10^{12}$ |
| 14 | 0   | $1.410 \times 10^4$    | 99 | $7.640 \times 10^{12}$ |
| 15 | 191 | $7.640 \times 10^{12}$ | 0  | $1.340 \times 10^4$    |
| 16 | 35  | $7.293 \times 10^{12}$ | 11 | $7.293 \times 10^{12}$ |
| 17 | 48  | $7.293 \times 10^{12}$ | 81 | $7.293 \times 10^{12}$ |
| 18 | 13  | $7.293 \times 10^{12}$ | 0  | $7.660 \times 10^{12}$ |
| 19 | 0   | $1.510 \times 10^7$    | 41 | $7.293 \times 10^{12}$ |
| 20 | 0   | $1.510 \times 10^7$    | 30 | $7.293 \times 10^{12}$ |
| 21 | 69  | $7.293 \times 10^{12}$ | 11 | $7.293 \times 10^{12}$ |
| 22 | 43  | $7.293 \times 10^{12}$ | 91 | $7.293 \times 10^{12}$ |
| 23 | 30  | $7.293 \times 10^{12}$ | 0  | $7.293 \times 10^{12}$ |

The rate constants were calculated using equation,

$$k = v \exp \left[ \frac{-E_{act}}{k_B T} \right]. \quad (24)$$

with  $E_{act}$  the activation energy and  $v$  the prefactor. The prefactors are calculated for the following three cases. The first case is a unimolecular reaction;  $v_1 = \frac{k_B T}{h}$ , where  $k_B$  is Boltzmann constant and  $h$  is Planck's constant. The second case is a bimolecular reaction;  $v_2 = \frac{\sqrt{(k_B T / 2\pi\mu)} 4\pi R^2}{V}$ , where  $\mu = \frac{m_1 m_2}{(m_1 + m_2)}$ ,  $m_1$  and  $m_2$  are the masses of the reactants,  $R$  is the distance between the reactants in

the transition state, and  $V$  is the volume of the simulation box. And the third case is a bimolecular reaction with solvent molecule as a reactant;  $v_3 = v_2 N_{solvent}$ .  $N_{solvent}$  is the number of solvent molecules. The number of  $H_3O^+$  and  $OH^-$  molecules are determined by pH. Such as the number of  $OH^-$  molecules,  $N_{(OH)^-} = N_A V 10^{(pH-14)}$ . More details can be found in the reference.<sup>2</sup>

The rate constants of silicate oligomerization reactions in the presence of counter ions ( $Li^+$  and  $NH_4^+$ ) were determined from density functional theory based molecular dynamics simulations.<sup>1</sup> In the case of dimerization, we considered a system consisting of one silicic acid  $Si(OH)_4$  and its deprotonated form  $Si(OH)_3O^-$  with 64 water molecules. The simulation cell was a periodically replicated cubic box with a size corresponding to a density of solution around  $1 \text{ g cm}^{-3}$  at ambient conditions. The temperature was set at  $T = 350 \text{ K}$  imposed with a Nosé-Hoover thermostat. The parameters obtained with presence of counter ions  $Li^+$  and  $NH_4^+$  are listed in Table 2 and Table 3 respectively.

**Table 2: Calculated activation energies [ $\text{kJ mol}^{-1}$ ], with presence of  $Li^+$  counter ions, and prefactors of reactions from Eq. (1) to Eq. (23). The first column is the reactions numbered corresponding to the Equations Eq. (1) to Eq. (23) listed above.  $E_{act}(1)$  and  $\text{Pref}(1)$  are the activation energy and prefactor of forward reaction respectively.  $E_{act}(-1)$  and  $\text{Pref}(-1)$  are the activation energy and prefactor of reverse reaction respectively. The temperature is  $350 \text{ K}$  and  $\text{pH} = 7$ .**

| Reactions | $E_{act}(1)$ | $\text{Pref}(1)$       | $E_{act}(-1)$ | $\text{Pref}(-1)$      |
|-----------|--------------|------------------------|---------------|------------------------|
| 1         | 0            | $1.484 \times 10^4$    | 99            | $8.050 \times 10^{12}$ |
| 2         | 191          | $8.040 \times 10^{12}$ | 0             | $1.417 \times 10^4$    |
| 3         | 0            | $1.820 \times 10^7$    | 28            | $7.293 \times 10^{12}$ |
| 4         | 70           | $7.293 \times 10^{12}$ | 61            | $7.293 \times 10^{12}$ |
| 5         | 89           | $7.293 \times 10^{12}$ | 121           | $7.293 \times 10^{12}$ |
| 6         | 9            | $7.293 \times 10^{12}$ | 0             | $7.750 \times 10^{12}$ |
| 7         | 0            | $1.434 \times 10^4$    | 99            | $7.750 \times 10^{12}$ |
| 8         | 191          | $7.750 \times 10^{12}$ | 0             | $1.360 \times 10^4$    |
| 9         | 0            | $1.600 \times 10^7$    | 31            | $7.293 \times 10^{12}$ |
| 10        | 0            | $1.600 \times 10^7$    | 54            | $7.293 \times 10^{12}$ |

|    |     |                        |     |                        |
|----|-----|------------------------|-----|------------------------|
| 11 | 78  | $7.293 \times 10^{12}$ | 66  | $7.293 \times 10^{12}$ |
| 12 | 96  | $7.293 \times 10^{12}$ | 112 | $7.293 \times 10^{12}$ |
| 13 | 7   | $7.293 \times 10^{12}$ | 0   | $7.640 \times 10^{12}$ |
| 14 | 0   | $1.410 \times 10^4$    | 99  | $7.640 \times 10^{12}$ |
| 15 | 191 | $7.640 \times 10^{12}$ | 0   | $1.340 \times 10^4$    |
| 16 | 83  | $7.293 \times 10^{12}$ | 66  | $7.293 \times 10^{12}$ |
| 17 | 94  | $7.293 \times 10^{12}$ | 91  | $7.293 \times 10^{12}$ |
| 18 | 13  | $7.293 \times 10^{12}$ | 0   | $7.660 \times 10^{12}$ |
| 19 | 0   | $1.510 \times 10^7$    | 41  | $7.293 \times 10^{12}$ |
| 20 | 0   | $1.510 \times 10^7$    | 30  | $7.293 \times 10^{12}$ |
| 21 | 60  | $7.293 \times 10^{12}$ | 65  | $7.293 \times 10^{12}$ |
| 22 | 85  | $7.293 \times 10^{12}$ | 98  | $7.293 \times 10^{12}$ |
| 23 | 30  | $7.293 \times 10^{12}$ | 0   | $7.293 \times 10^{12}$ |

Some of the energies in the tables are corrected, because the silicate condensation reactions are endothermic in the simulations with water molecules treated explicitly.<sup>1,3</sup> This is questionable, because it would mean that the oligomers will not form. We attribute this to the contribution of entropy reduction from the water shell around the silicate molecules. Leung et al.<sup>4</sup> have examined the source of the entropy reduction which occurs when a gas-phase molecule is moved into solution and have concluded that the main contribution to the entropy change comes from cavity formation in the solvent. The change in entropy mainly comes from the rearrangement of the water shell, that is dominated by hydrogen bonds. The larger the molecule, the larger the water shell around it, and hence the change in water shell is larger for a larger molecule. This indicates that the addition of counter ions contribute to the entropy change, and the contribution from  $\text{NH}_4^+$  is larger than that from  $\text{Li}^+$ , due to the larger volume of  $\text{NH}_4^+$ . To make the reactions exothermic, we reduce the entropy contribution from the water shell and the counter ions. The entropy contribution of these three sets of parameters (without counter ion, with  $\text{Li}^+$  and with  $\text{NH}_4^+$ ) are reduced somewhat

arbitrarily by 50 kJ/mol, 60 kJ/mol and 70 kJ/mol respectively. The counter ions have contribution to the intermediate states as well. We then reduce the energies of the intermediate states of the two sets of parameters (with  $\text{Li}^+$  and with  $\text{NH}_4^+$ ) by 50 kJ/mol and 60 kJ/mol respectively. Although it is somewhat arbitrary, it is reasonable. If the energy contributions are reduced less, the reactions will not take place. If they are reduced more, dimers are too stable, as a result no further oligomerization reactions occur.

In this work, we only study the silicate oligomerization at neutral pH and temperature of 350 K. The change of pH consequently changes the number of  $\text{H}_3\text{O}^+$  and  $\text{OH}^-$  ions. The pH only changes the rate constants of bimolecular reactions with solvent molecule as a reactant. The changed rate constants can be easily calculated by changing  $N_{\text{solvent}}$ .  $N_{\text{solvent}}$  can be the number of water molecules,  $\text{H}_3\text{O}^+$  or  $\text{OH}^-$  ions as described in the next section. The others remain the same. The rate constant is related to temperature by the Eq. (24). The rate constants at other temperatures can be calculated from the available prefactors. Thus we give the activation energies and prefactors, the readers can calculate the rate constants for other pHs and temperatures themselves.

**Table 3: Calculated activation energies [ $\text{kJ mol}^{-1}$ ], with presence of  $\text{NH}_4^+$  counter ions, and prefactors of reactions from Eq. (1) to Eq. (23). The first column is the reactions numbered corresponding to the Equations Eq. (1) to Eq. (23) listed above.  $E_{\text{act}}(1)$  and  $\text{Pref}(1)$  are the activation energy and prefactor of forward reaction respectively.  $E_{\text{act}}(-1)$  and  $\text{Pref}(-1)$  are the activation energy and prefactor of reverse reaction respectively. The temperature is 350 K and  $\text{pH} = 7$ .**

| Reactions | $E_{\text{act}}(1)$ | $\text{Pref}(1)$       | $E_{\text{act}}(-1)$ | $\text{Pref}(-1)$      |
|-----------|---------------------|------------------------|----------------------|------------------------|
| 1         | 0                   | $1.484 \times 10^4$    | 99                   | $8.050 \times 10^{12}$ |
| 2         | 191                 | $8.040 \times 10^{12}$ | 0                    | $1.417 \times 10^4$    |
| 3         | 0                   | $1.820 \times 10^7$    | 28                   | $7.293 \times 10^{12}$ |
| 4         | 106                 | $7.293 \times 10^{12}$ | 81                   | $7.293 \times 10^{12}$ |
| 5         | 95                  | $7.293 \times 10^{12}$ | 115                  | $7.293 \times 10^{12}$ |
| 6         | 9                   | $7.293 \times 10^{12}$ | 0                    | $7.750 \times 10^{12}$ |
| 7         | 0                   | $1.434 \times 10^4$    | 99                   | $7.750 \times 10^{12}$ |
| 8         | 191                 | $7.750 \times 10^{12}$ | 0                    | $1.360 \times 10^4$    |

|    |     |                        |     |                        |
|----|-----|------------------------|-----|------------------------|
| 9  | 0   | $1.600 \times 10^7$    | 31  | $7.293 \times 10^{12}$ |
| 10 | 0   | $1.600 \times 10^7$    | 54  | $7.293 \times 10^{12}$ |
| 11 | 63  | $7.293 \times 10^{12}$ | 72  | $7.293 \times 10^{12}$ |
| 12 | 82  | $7.293 \times 10^{12}$ | 119 | $7.293 \times 10^{12}$ |
| 13 | 7   | $7.293 \times 10^{12}$ | 0   | $7.640 \times 10^{12}$ |
| 14 | 0   | $1.410 \times 10^4$    | 99  | $7.640 \times 10^{12}$ |
| 15 | 191 | $7.640 \times 10^{12}$ | 0   | $1.340 \times 10^4$    |
| 16 | 54  | $7.293 \times 10^{12}$ | 66  | $7.293 \times 10^{12}$ |
| 17 | 94  | $7.293 \times 10^{12}$ | 105 | $7.293 \times 10^{12}$ |
| 18 | 13  | $7.293 \times 10^{12}$ | 0   | $7.660 \times 10^{12}$ |
| 19 | 0   | $1.510 \times 10^7$    | 41  | $7.293 \times 10^{12}$ |
| 20 | 0   | $1.510 \times 10^7$    | 30  | $7.293 \times 10^{12}$ |
| 21 | 62  | $7.293 \times 10^{12}$ | 76  | $7.293 \times 10^{12}$ |
| 22 | 102 | $7.293 \times 10^{12}$ | 108 | $7.293 \times 10^{12}$ |
| 23 | 30  | $7.293 \times 10^{12}$ | 0   | $7.293 \times 10^{12}$ |

## Theory of Continuum kMC

The kMC simulations were carried out using our newly developed continuum kMC.<sup>2</sup> The reaction time of a unimolecular reaction is given by the usual expression<sup>5</sup>

$$\Delta t = -\frac{1}{k_{\text{rx}}} \ln r \quad (25)$$

with  $\Delta t$  the time between the time that the particle was formed and the reaction,  $r$  a random number from the interval  $[0, 1)$ , and  $k_{\text{rx}}$  the rate constant of the reaction.

For the reaction times  $t_{\text{rx}}$  for bimolecular reactions between particles 1 and 2 we can write

$$\text{erfc}\left(\frac{\alpha}{\sqrt{\Delta t}}\right) = \beta \quad (26)$$

with

$$\begin{aligned} \beta = & - \frac{4\pi(D_1 + D_2)|\mathbf{r}_2 - \mathbf{r}_1| \ln r}{k_{\text{rx}} L^3} \\ & + \text{erfc}\left(\frac{|\mathbf{r}_2 - \mathbf{r}_1|}{2\sqrt{D_1(\tau_2 - \tau_1)}}\right) \end{aligned} \quad (27)$$

and

$$\Delta t = t_{\text{rx}} - \frac{D_1 \tau_1 + D_2 \tau_2}{D_1 + D_2}. \quad (28)$$

Here  $D_i$  is the diffusion constant of particle  $i$ ,  $\tau_i$  the time that it was formed, and  $\mathbf{r}_i$  the position where it was formed. Furthermore  $k_{\text{rx}}$  is the time that the reaction takes place, and  $L$  is the size of the simulation box which we take to be cubic. The function  $\text{erfc}$  is the error function complement.<sup>6</sup> It equals one minus the error function.

Determining the position where a unimolecular reaction takes place is quite easy. The particle simply diffuses and then reacts at whatever place it will be. So if a particle is at position  $\mathbf{r}'$  at time  $\tau$ , then diffusion will bring it to position  $\mathbf{r}$  at a time  $t$  with  $t > \tau$  with probability

$$\frac{1}{[4\pi D(t - \tau)]^{3/2}} \exp\left[-\frac{|\mathbf{r} - \mathbf{r}'|^2}{4D(t - \tau)}\right], \quad (29)$$

where  $D$  is its diffusion constant.

For a bimolecular reaction it becomes a bit more difficult. Diffusion will bring the reactants to position  $\mathbf{r}$  at a time  $t$  with  $t > \tau_i$  with probability

$$\frac{1}{[4\pi D_i(t - \tau_i)]^{3/2}} \exp\left[-\frac{|\mathbf{r} - \mathbf{r}_i|^2}{4D_i(t - \tau_i)}\right]. \quad (30)$$

So they will both be at position  $\mathbf{r}$  with a probability proportional to

$$\exp\left[-\frac{|\mathbf{r}-\mathbf{r}_1|^2}{4D_1(t-\tau_1)}\right]\exp\left[-\frac{|\mathbf{r}-\mathbf{r}_2|^2}{4D_2(t-\tau_2)}\right]. \quad (31)$$

This is a probability distribution centered at

$$\frac{D_2(t-\tau_2)\mathbf{r}_1 + D_1(t-\tau_1)\mathbf{r}_2}{D_1(t-\tau_1) + D_2(t-\tau_2)} \quad (32)$$

with a width

$$\sqrt{\frac{2D_1(t-\tau_1)D_2(t-\tau_2)}{D_1(t-\tau_1) + D_2(t-\tau_2)}} \quad (33)$$

in all directions. More detailed information about the continuum kMC method can be found in reference.<sup>2</sup>

The dependence of the reaction times of bimolecular reactions on the size  $L$  of the simulation box, which may seem to be odd, is explained here. We need to know the relation between the kMC and the macroscopic rate constants. For a reaction  $A + B \rightarrow C$  we have

$$\frac{d[A]}{dt} = -k[A][B] \quad (34)$$

with  $k$  the macroscopic rate constant. In a kMC simulation we work with discrete particles. We have to multiply by  $L^3$  with  $L$  is the side length of the simulation box. Then we have

$$\frac{dN_A}{dt} = -\frac{k}{L^3}N_A N_B = -\omega N_A N_B \quad (35)$$

with  $N_A$  and  $N_B$  are the number of A and B respectively.  $\omega$  is the kMC rate constant. It is related to the macroscopic rate constant via  $k = \omega L^3$ . As the macroscopic rate constant  $k$  in Eq. (34) does not depend on the system size, we see that  $\omega$  must be proportional to  $L^{-3}$ .

An important advantage of continuum kMC is that solvent molecules can be removed from the simulations, which minimizes the number of particles that have to be simulated explicitly. If the

solvent is only a spectator in the reactions, then we can ignore it. For the case of silicate solution, water molecules participate in acid-base reactions. Silicate species can donate a proton to  $\text{OH}^-$  (or  $\text{H}_2\text{O}$ ). For example,  $\text{Si}(\text{OH})_4$  is then transformed into  $\text{Si}(\text{OH})_3\text{O}^-$ . There is also a reverse reaction where  $\text{Si}(\text{OH})_3\text{O}^-$  gets back a proton from  $\text{H}_2\text{O}$  (or  $\text{H}_3\text{O}^+$ ). These processes can be given by the following two example equations.

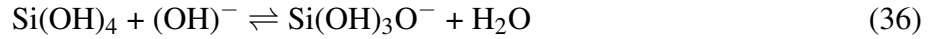

with macroscopic rate constants  $k_1$  and  $k_{-1}$  (reverse process), and,

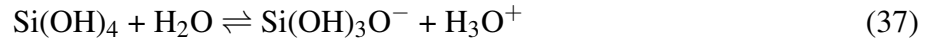

with macroscopic rate constants  $k_2$  and  $k_{-2}$  (reverse process). We can write macroscopic rate equations for these equilibria. Let's take the first case as an example,

$$\frac{d[\text{Si}(\text{OH})_4]}{dt} = -k_1[\text{Si}(\text{OH})_4][\text{OH}^-] + k_{-1}[\text{Si}(\text{OH})_3\text{O}^-][\text{H}_2\text{O}] \quad (38)$$

The solvent actually participates in the reaction, but we if do not want to include it explicitly in our simulations, then the rate constants above need to be modified. The expression above shows that we can accomplish this by replacing the equilibria above by

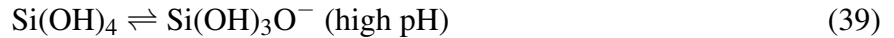

with rate constants  $k_1[(\text{OH})^-] = \omega_1 N_{(\text{OH})^-}$  and  $k_{-1}[\text{H}_2\text{O}] = \omega_{-1} N_{\text{H}_2\text{O}}$ , with  $k_n = \omega_n L^3$  [see Eq. (35)], and  $\omega_n$  the kMC rate constants. The  $N_{(\text{OH})^-}$  and  $N_{\text{H}_2\text{O}}$  are the number of  $(\text{OH})^-$  and  $\text{H}_2\text{O}$  in the simulation box. We also have,

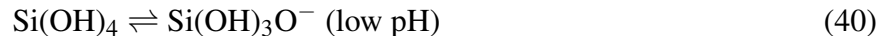

with rate constants  $k_2[\text{H}_2\text{O}] = \omega_2 N_{\text{H}_2\text{O}}$  and  $k_{-2}[\text{H}^+] = \omega_{-2} N_{\text{H}^+}$ .  $[(\text{OH})^-]$  and  $[\text{H}^+]$  are determined by the pH of solution, such as  $[(\text{OH})^-] = 10^{-7}$  mol/L at pH = 7.

## References

- (1) Trinh, T. T.; Jansen, A. P. J.; van Santen, R. A.; VandeVondele, J.; Meijer, E. J. *ChemPhysChem* **2009**, *10*, 1775.
- (2) Zhang, X.-Q.; Jansen, A. P. J. *Phys. Rev. E* **2010**, *82*, 046704.
- (3) Trinh, T. T.; Jansen, A. P. J.; van Santen, R. A.; Meijer, E. J. *Phys. Chem. Chem. Phys.* **2009**, *11*, 5092.
- (4) Leung, B. O.; Read, D. L.; Armstrong, D. A.; Rauk, A. J. *Phys. Chem. A* **2004**, *108*, 2720.
- (5) Lukkien, J. J.; Segers, J. P. L.; Hilbers, P. A. J.; Gelten, R. J.; Jansen, A. P. J. *Phys. Rev. E* **1998**, *58*, 2598.
- (6) Abramowitz, M.; Stegun, I. A. *Handbook Of Mathematical Functions with Formulas, Graphs, and Mathematical Tables*; 1965.
